# Supplementary material
Source: MDPI journal article supplement (https://www.mdpi.com/2072-4292/14/22/5708)
Supplement: s1 [file s1]

# Improved vegetation ecological quality of the Three-North Shelterbelt project region of China during 2000–2020 evidenced from multiple remotely sensed indicators

Chao Li <sup>1,2</sup>, Shiqiang Zhang <sup>1,2,\*</sup>, Manyi Cui <sup>1,2</sup>, Junhong Wan <sup>1,2</sup>, Tianxing Rao <sup>1,2</sup>, Wen Li<sup>1,2</sup> and Xin Wang <sup>3</sup>

<sup>1</sup> College of Urban and Environmental Science, Northwest University, Xi'an 710127, China

<sup>2</sup> Shaanxi Key Laboratory of Earth Surface System and Environmental Carrying Capacity, Northwest University, Xi'an 710127, China

<sup>3</sup> Department of Geography, Hunan University of Science and Technology, Xiangtan 411100, China

\* Correspondence: zhangsq@nwu.edu.cn

## Contents of this file

Text S1

Figure S1 to S7

Table S1 to S4

Text S1: Principal component analysis of each indicator.

Figure S1: Area proportion statistics of VEQI for each grade over the years.

Figure S2: Spatio-temporal change characteristics of TEM (a, d), PRE (b, e), and SNR (c, f) in the TNS from 2000 to 2020.

Figure S3: Temporal trends in the residuals of TNS and each climate zone.

Figure S4: Statistics of the relative contributions of climate variation and human activities to VEQI in each climate zone: (a) and (c) are the relative contributions of climate variation to VEQI in increasing (decreasing) regions, respectively; (b) and (d) are the relative contributions of human activities to VEQI in increasing (decreasing) regions, respectively.

Figure S5: Spatial distribution of the transfer of main land-use types of the TNS from 2000 to 2020.

Figure S6: Statistics of annual fixed and cumulative fixed investments in forestry projects in the TNS and each province from 2000 to 2020.

Figure S7: The relationships between cumulative fixed investment and VEQI of forestry projects in the TNS and each province.

Table S1: Results of PCA of each indicator.

Table S2: Future trends of VEQ in the TNS.

Table S3: Suitable scopes or types of the factors.

Table S4: Statistics of the proportion of land use transfer area in the TNS from 2000 to 2020 (km<sup>2</sup>).

**Text S1.** Principal component analysis of each indicator

The results of principal component analysis for only four years are presented in this paper (Table S1). The cumulative contribution of the first (PC1) and second principal components (PC2) to the VEQI of the four-year data exceeded 93%, indicating that most characteristics of the six indicators were integrated by PC1 and PC2. Therefore, PC1 and PC2 were selected to construct the VEQI.

**Table S1.** Results of PCA of each indicator.

| Each index                        | 2000   |       | 2007   |       | 2014   |       | 2020   |       |
|-----------------------------------|--------|-------|--------|-------|--------|-------|--------|-------|
|                                   | PC1    | PC2   | PC1    | PC2   | PC1    | PC2   | PC1    | PC2   |
| LST                               | -0.269 | 0.802 | -0.272 | 0.832 | -0.264 | 0.825 | -0.241 | 0.903 |
| WUE                               | 0.061  | 0.693 | 0.075  | 0.851 | 0.213  | 0.835 | 0.170  | 0.739 |
| NPP                               | 0.869  | 0.269 | 0.932  | 0.252 | 0.911  | 0.231 | 0.9311 | 0.135 |
| FVC                               | 0.902  | 0.248 | 0.902  | 0.262 | 0.902  | 0.252 | 0.932  | 0.102 |
| LAI                               | 0.812  | 0.419 | 0.830  | 0.323 | 0.910  | 0.283 | 0.909  | 0.221 |
| WET                               | 0.442  | 0.739 | 0.418  | 0.732 | 0.423  | 0.769 | 0.413  | 0.902 |
| Eigenvalues                       | 3.132  | 1.903 | 3.113  | 2.186 | 3.098  | 2.312 | 2.769  | 2.356 |
| Variance contribution%            | 54.13  | 35.62 | 53.56  | 34.46 | 53.21  | 35.56 | 50.68  | 39.31 |
| Cumulative variance contribution% | 54.13  | 89.75 | 53.56  | 88.02 | 53.21  | 88.77 | 50.68  | 89.99 |

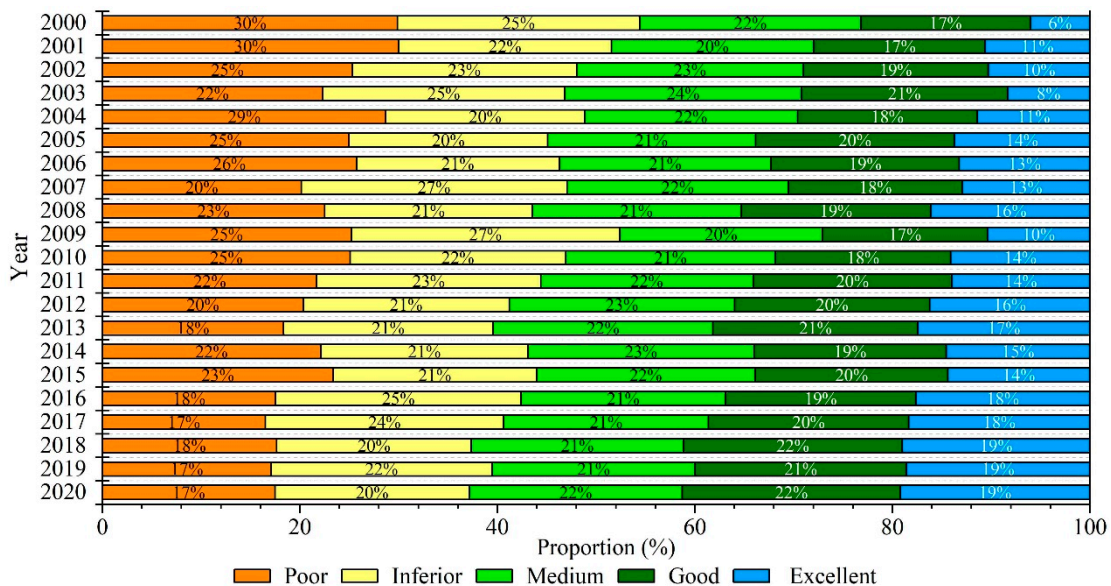

**Figure S1.** Area proportion statistics of VEQI for each grade over the years.

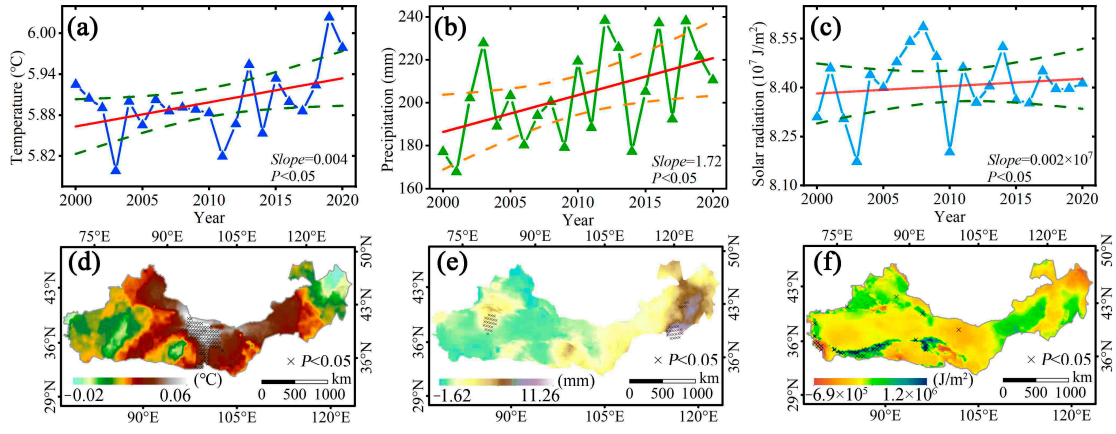

**Figure S2.** Spatio-temporal change characteristics of TEM (a, d), PRE (b, e), and SNR (c, f) in the TNS from 2000 to 2020.

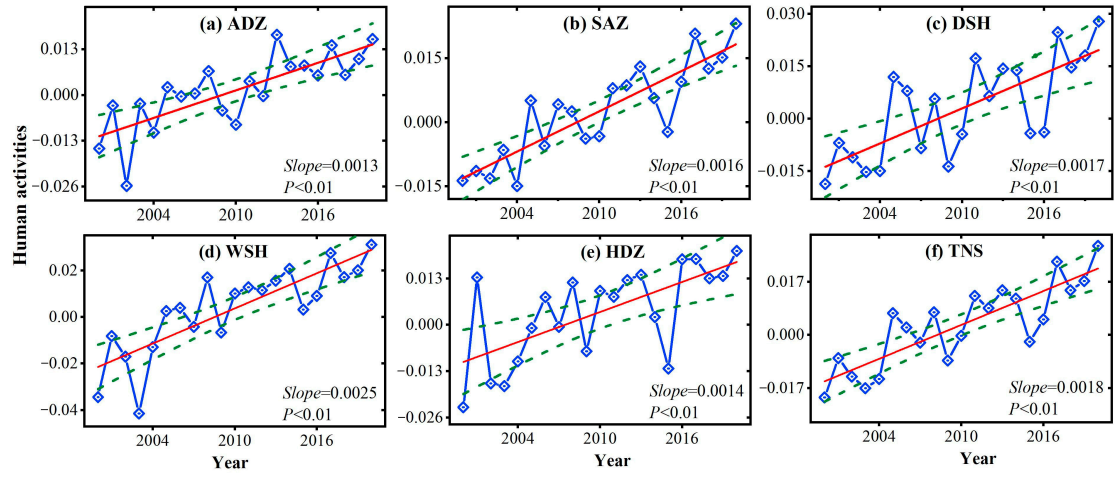

**Figure S3.** Temporal trends in the residuals of TNS and each climate zone.

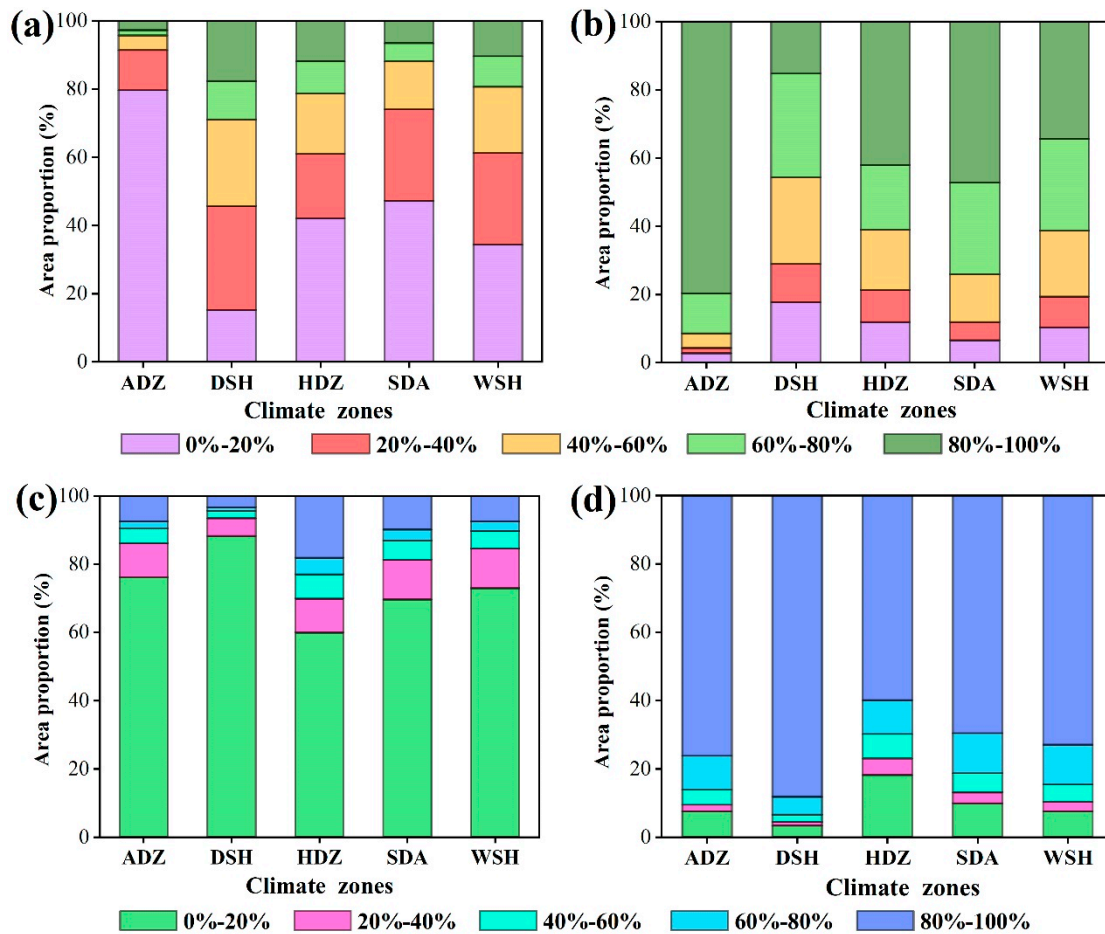

**Figure S4.** Statistics of the relative contributions of climate variation and human activities to VEQI in each climate zone: (a) and (c) are the relative contributions of climate variation to VEQI in increasing (decreasing) regions, respectively; (b) and (d) are the relative contributions of human activities to VEQI in increasing (decreasing) regions, respectively.

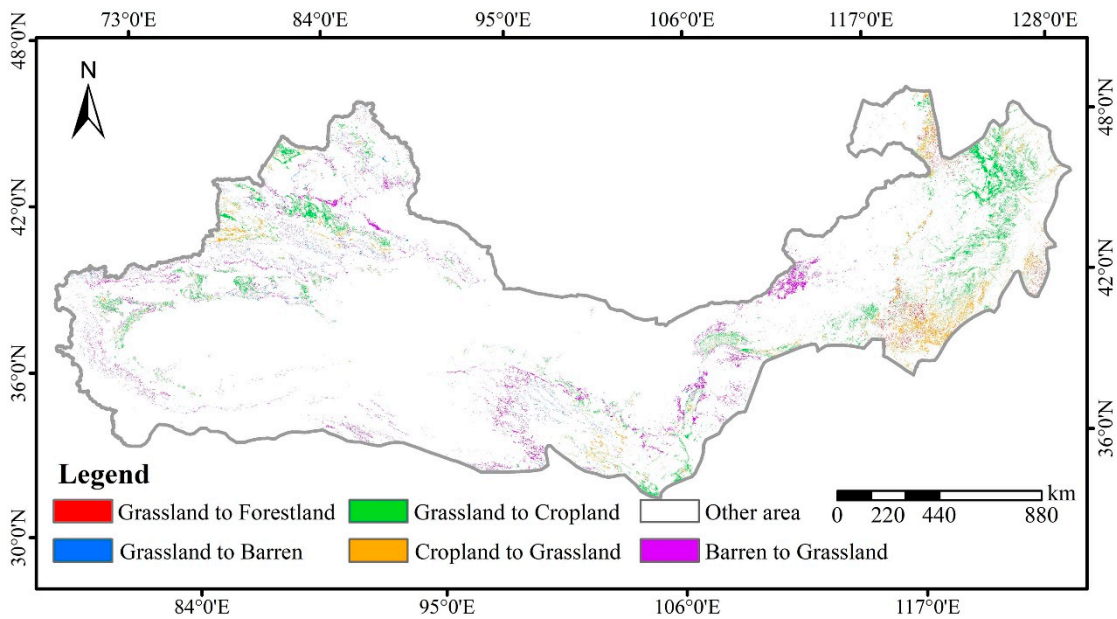

**Figure S5.** Spatial distribution of the transfer of main land-use types of the TNS from 2000 to 2020.

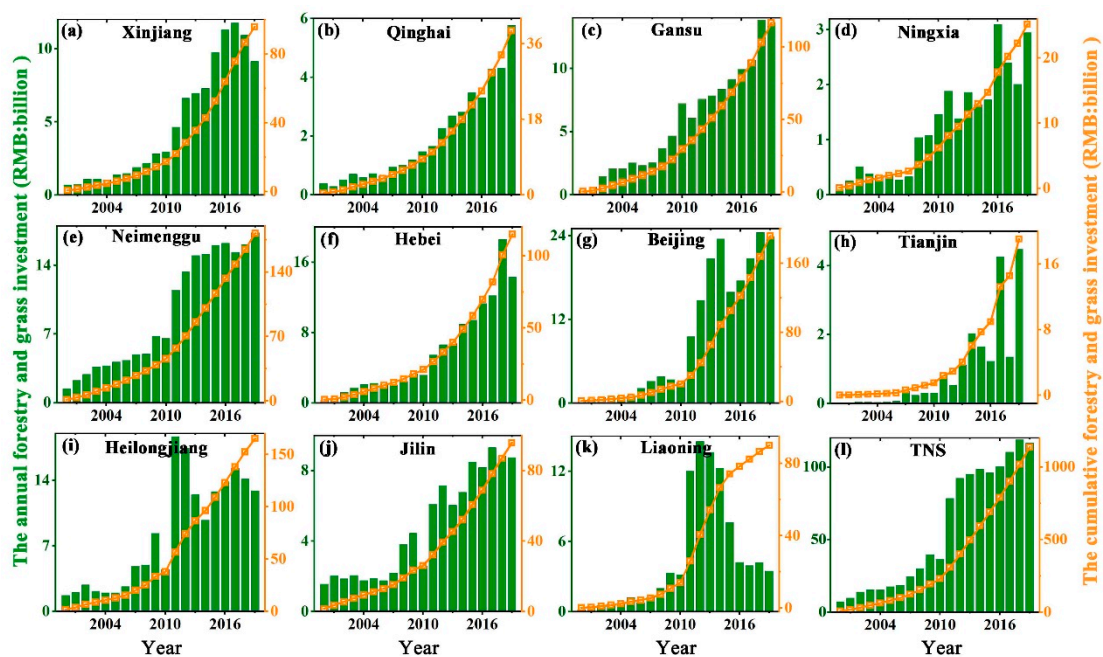

**Figure S6.** Statistics of annual fixed and cumulative fixed investments in forestry projects in the TNS and each province from 2000 to 2020.

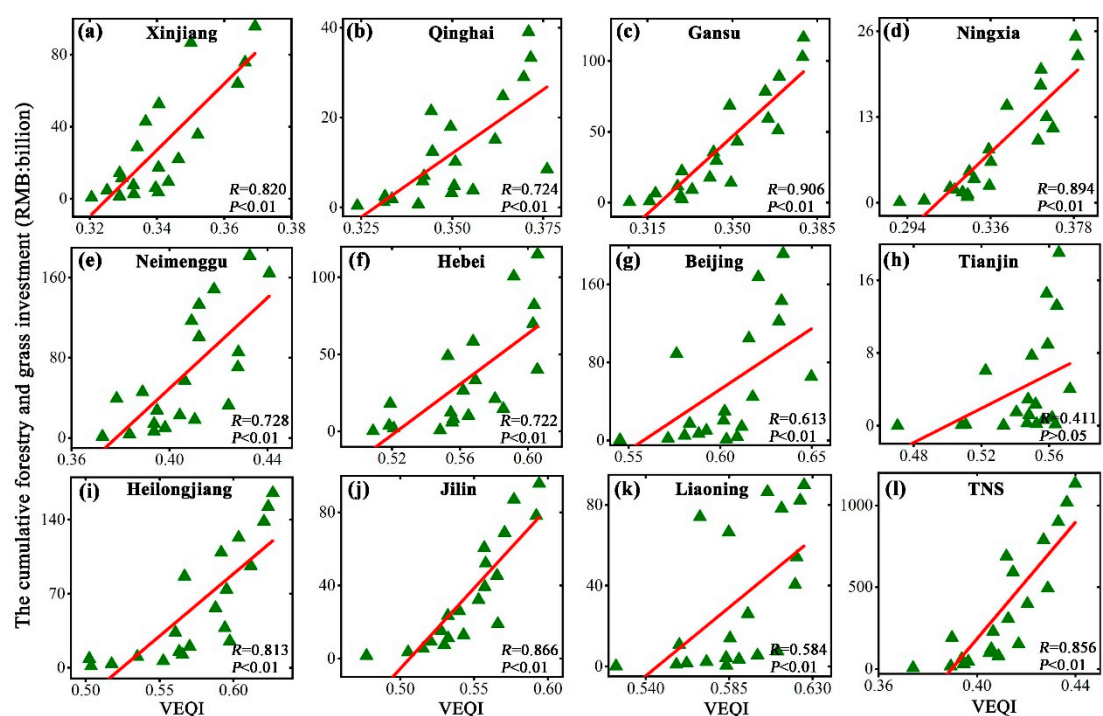

**Figure S7.** The relationships between cumulative fixed investment and VEQI of forestry projects in the TNS and each province.

Table S2. Future trends of VEQ in the TNS.

| Future trends | Variation trends and Persistence        |                                              | Proportion (%) |       |
|---------------|-----------------------------------------|----------------------------------------------|----------------|-------|
|               | Slope & MK-Significant & Hurst exponent | Coupling results                             |                |       |
| Malignant     | Slope<-0.001 &  Z >1.96 & 0.5<Hurst<1   | Significant degradation& Persistence         | 0.55           | 51.31 |
|               | Slope<-0.001 &  Z ≤1.96 & 0.5<Hurst<1   | Insignificant degradation& Persistence       | 1.33           |       |
|               | Slope>0.001 &  Z >1.96 & 0≤Hurst<0.5    | Significant improvement & Anti-persistence   | 31.48          |       |
|               | Slope>0.001 &  Z ≤1.96 & 0≤Hurst<0.5    | Insignificant improvement & Anti-persistence | 17.95          |       |
| Benign        | Slope>0.001 &  Z >1.96 & 0.5<Hurst<1    | Significant improvement & Persistence        | 13.79          | 22.35 |
|               | Slope>0.001 &  Z ≤1.96 & 0.5<Hurst<1    | Insignificant improvement & Persistence      | 5.72           |       |
|               | Slope<-0.001 &  Z >1.96 & 0≤Hurst<0.5   | Significant degradation & Anti-persistence   | 0.52           |       |
|               | Slope<-0.001 &  Z ≤1.96 & 0≤Hurst<0.5   | Insignificant degradation & Anti-persistence | 2.32           |       |
| Stability     | -0.001 ≤ Slope ≤ 0.001                  | Stability                                    | 26.34          | 26.34 |

Table S3. Suitable scopes or types of the factors.

| Climate zones | Factors                                    | Suitable scope or type | VEQI  | Climate zones | Factors                               | Suitable scope or type | VEQI  |
|---------------|--------------------------------------------|------------------------|-------|---------------|---------------------------------------|------------------------|-------|
| ADZ           | TEM/°C                                     | 11.21–15.59            | 0.268 | SAZ           | TEM/°C                                | -2.48–0.43             | 0.308 |
|               | PRE/mm                                     | 36–53                  | 0.259 |               | PRE/mm                                | 504–738                | 0.389 |
|               | WS/m.s <sup>-1</sup>                       | 1.50–1.86              | 0.265 |               | WS/m.s <sup>-1</sup>                  | 2.41–2.76              | 0.326 |
|               | EVA/mm                                     | 1266–1366              | 0.268 |               | EVA/mm                                | 1172–1313              | 0.307 |
|               | SOI/mm                                     | 0–22.49                | 0.249 |               | SOI/mm                                | 64.99–149              | 0.346 |
|               | SNR/10 <sup>7</sup> J.m <sup>-2</sup>      | 8.3–8.9                | 0.258 |               | SNR/10 <sup>7</sup> J.m <sup>-2</sup> | 9.8–11.3               | 0.323 |
|               | PD/person.km <sup>-2</sup>                 | 11358–15459            | 0.241 |               | PD/person.km <sup>-2</sup>            | 6281–37690             | 0.426 |
|               | DEM/m                                      | 0–661                  | 0.281 |               | DEM/m                                 | 0–730                  | 0.328 |
|               | SLO/°                                      | 0–1.13                 | 0.260 |               | SLO/°                                 | 0–1.13                 | 0.294 |
|               | ASP                                        | Plane                  | 0.246 |               | ASP                                   | Plane                  | 0.289 |
|               | VT                                         | PF                     | 0.461 |               | VT                                    | PF                     | 0.480 |
|               | ST                                         | Silty clay             | 0.267 |               | ST                                    | Silt loam              | 0.425 |
| DSH           | TEM/°C                                     | -2.29–0.14             | 0.476 | WSH           | TEM/°C                                | 6.69–9.61              | 0.609 |
|               | PRE/mm                                     | 396–444                | 0.489 |               | PRE/mm                                | 394–422                | 0.610 |
|               | WS/m.s <sup>-1</sup>                       | 3.48–3.71              | 0.479 |               | WS/m.s <sup>-1</sup>                  | 2.58–2.90              | 0.609 |
|               | EVA/mm                                     | 638–737                | 0.487 |               | EVA/mm                                | 680–765                | 0.620 |
|               | SOI/mm                                     | 77.25–129.93           | 0.514 |               | SOI/mm                                | 128.95–167.83          | 0.611 |
|               | SNR/10 <sup>7</sup> J.m <sup>-2</sup>      | 10.3–11.2              | 0.551 |               | SNR/10 <sup>7</sup> J.m <sup>-2</sup> | 10.9–11.4              | 0.665 |
|               | PD/10 <sup>5</sup> person km <sup>-2</sup> | 8.04–16.80             | 0.476 |               | PD/person.km <sup>-2</sup>            | 248618–111877          | 0.578 |
|               | DEM/m                                      | 0–408                  | 0.503 |               | DEM/m                                 | 344–710                | 0.644 |
|               | SLO/°                                      | 4.43–6.64              | 0.472 |               | SLO/°                                 | 0–0.84                 | 0.597 |
|               | ASP                                        | East                   | 0.459 |               | ASP                                   | West                   | 0.580 |
|               | VT                                         | PF                     | 0.616 |               | VT                                    | BF                     | 0.682 |
|               | ST                                         | Heavy clay             | 0.564 |               | ST                                    | Silt loam              | 0.616 |
| HDZ           | TEM/°C                                     | 4.51–6.44              | 0.740 | TNS           | TEM/°C                                | -3.73–0.63             | 0.392 |
|               | PRE/mm                                     | 604–678                | 0.784 |               | PRE/mm                                | 524–738                | 0.651 |
|               | WS/m s <sup>-1</sup>                       | 2.15–2.45              | 0.784 |               | WS/m.s <sup>-1</sup>                  | 2.49–2.83              | 0.382 |
|               | EVA/mm                                     | 929–1031               | 0.708 |               | EVA/mm                                | 724–831                | 0.421 |
|               | SOI/mm                                     | 189.5–234.1            | 0.679 |               | SOI/mm                                | 136.49–207.98          | 0.542 |
|               | SNR/10 <sup>7</sup> J.m <sup>-2</sup>      | 10.1–10.5              | 0.721 |               | SNR/10 <sup>7</sup> J.m <sup>-2</sup> | 10.2–11.4              | 0.567 |
|               | PD/person km <sup>-2</sup>                 | 0–35834                | 0.595 |               | PD/person.km <sup>-2</sup>            | 32952–138402           | 0.505 |
|               | DEM/m                                      | 268–631                | 0.664 |               | DEM/m                                 | 0–599                  | 0.506 |
|               | SLO/°                                      | 0.95–2.31              | 0.638 |               | SLO/°                                 | 3.24–6.20              | 0.347 |
|               | ASP                                        | Northwest              | 0.622 |               | ASP                                   | Southeast              | 0.351 |
|               | VT                                         | BF                     | 0.778 |               | VT                                    | CF                     | 0.617 |
|               | ST                                         | Silt loam              | 0.656 |               | ST                                    | Silt loam              | 0.507 |

**Table S4.** Statistics of the proportion of land use transfer area in the TNS from 2000 to 2020 (km<sup>2</sup>).

| <b>Land-use types</b> | <b>Forestland</b> | <b>Shrub</b> | <b>Grassland</b> | <b>Wetland</b> | <b>Cropland</b> | <b>Impervious</b> | <b>Snow/Ice</b> | <b>Barren</b> | <b>Water</b> |
|-----------------------|-------------------|--------------|------------------|----------------|-----------------|-------------------|-----------------|---------------|--------------|
| Forestland            | 15606.75          | 83.5         | 2693             | 39.5           | 69.25           | 0                 | 0               | 0             | 0            |
| Shrub                 | 571.25            | 681.75       | 1150             | 0              | 4.5             | 0                 | 3.25            | 9.5           | 0            |
| Grassland             | 5926.75           | 1380.75      | 1214686          | 1532.25        | 69656           | 347.5             | 22.75           | 7095.5        | 233.25       |
| Wetland               | 110               | 0            | 226              | 869.25         | 13.5            | 1.75              | 0               | 9.25          | 37.25        |
| Cropland              | 795.75            | 77.75        | 27729.25         | 309.75         | 252700.3        | 1167.5            | 0.75            | 57.5          | 129.25       |
| Impervious            | 0                 | 0            | 0                | 0              | 0               | 6001.25           | 0               | 0             | 0            |
| Snow/Ice              | 0                 | 0.25         | 15.75            | 0              | 0.75            | 0                 | 248.75          | 153           | 0.75         |
| Barren                | 0                 | 502.25       | 38410.75         | 59.5           | 804.5           | 9                 | 447.25          | 70372.25      | 151          |
| Water                 | 0                 | 0            | 10.75            | 7.75           | 1.25            | 0                 | 2               | 17.5          | 240          |
